# Supplementary material for: UPF1 plays critical roles in early B cell development
Source: PubMed Central journal article supplement (PMC11233602; doi:10.1038/s41467-024-50032-6), 2024-07-09
Supplement: 41467_2024_50032_MOESM1_ESM.pdf [file 41467_2024_50032_MOESM1_ESM.pdf]

# Supplementary Information

## UPF1 Plays Critical Roles in Early B Cell Development

- Supplementary Figure 1** Analysis and generation of B cell specific *Upf1* deficient mice
- Supplementary Figure 2** Enrichment score plot of down-regulated genes in *Upf1*-deficient early LPre-B cells
- Supplementary Figure 3** Loss of IFN $\alpha$ R1 signaling does not impact B cell development.
- Supplementary Figure 4** Genetic pre-arrangement of *Igh* locus rescued early to late LPre B cell differentiation in *Upf1*-cKO mice
- Supplementary Figure 5** Genetic pre-arrangement of *Igh* locus did not rescue the splenic B cell population in *Upf1*-cKO mice
- Supplementary Figure 6** Transcriptome analysis of *Upf1*-cKO/*Igh*<sup>B1-8hi</sup> early LPre- and sPre-B cells
- Supplementary Figure 7** Identifying UPF1-target RNAs
- Supplementary Table 1** List of primers used for PCR
- Supplementary Table 2** List of antibodies
- Supplementary Table 3** List of primers used for RT-qPCR

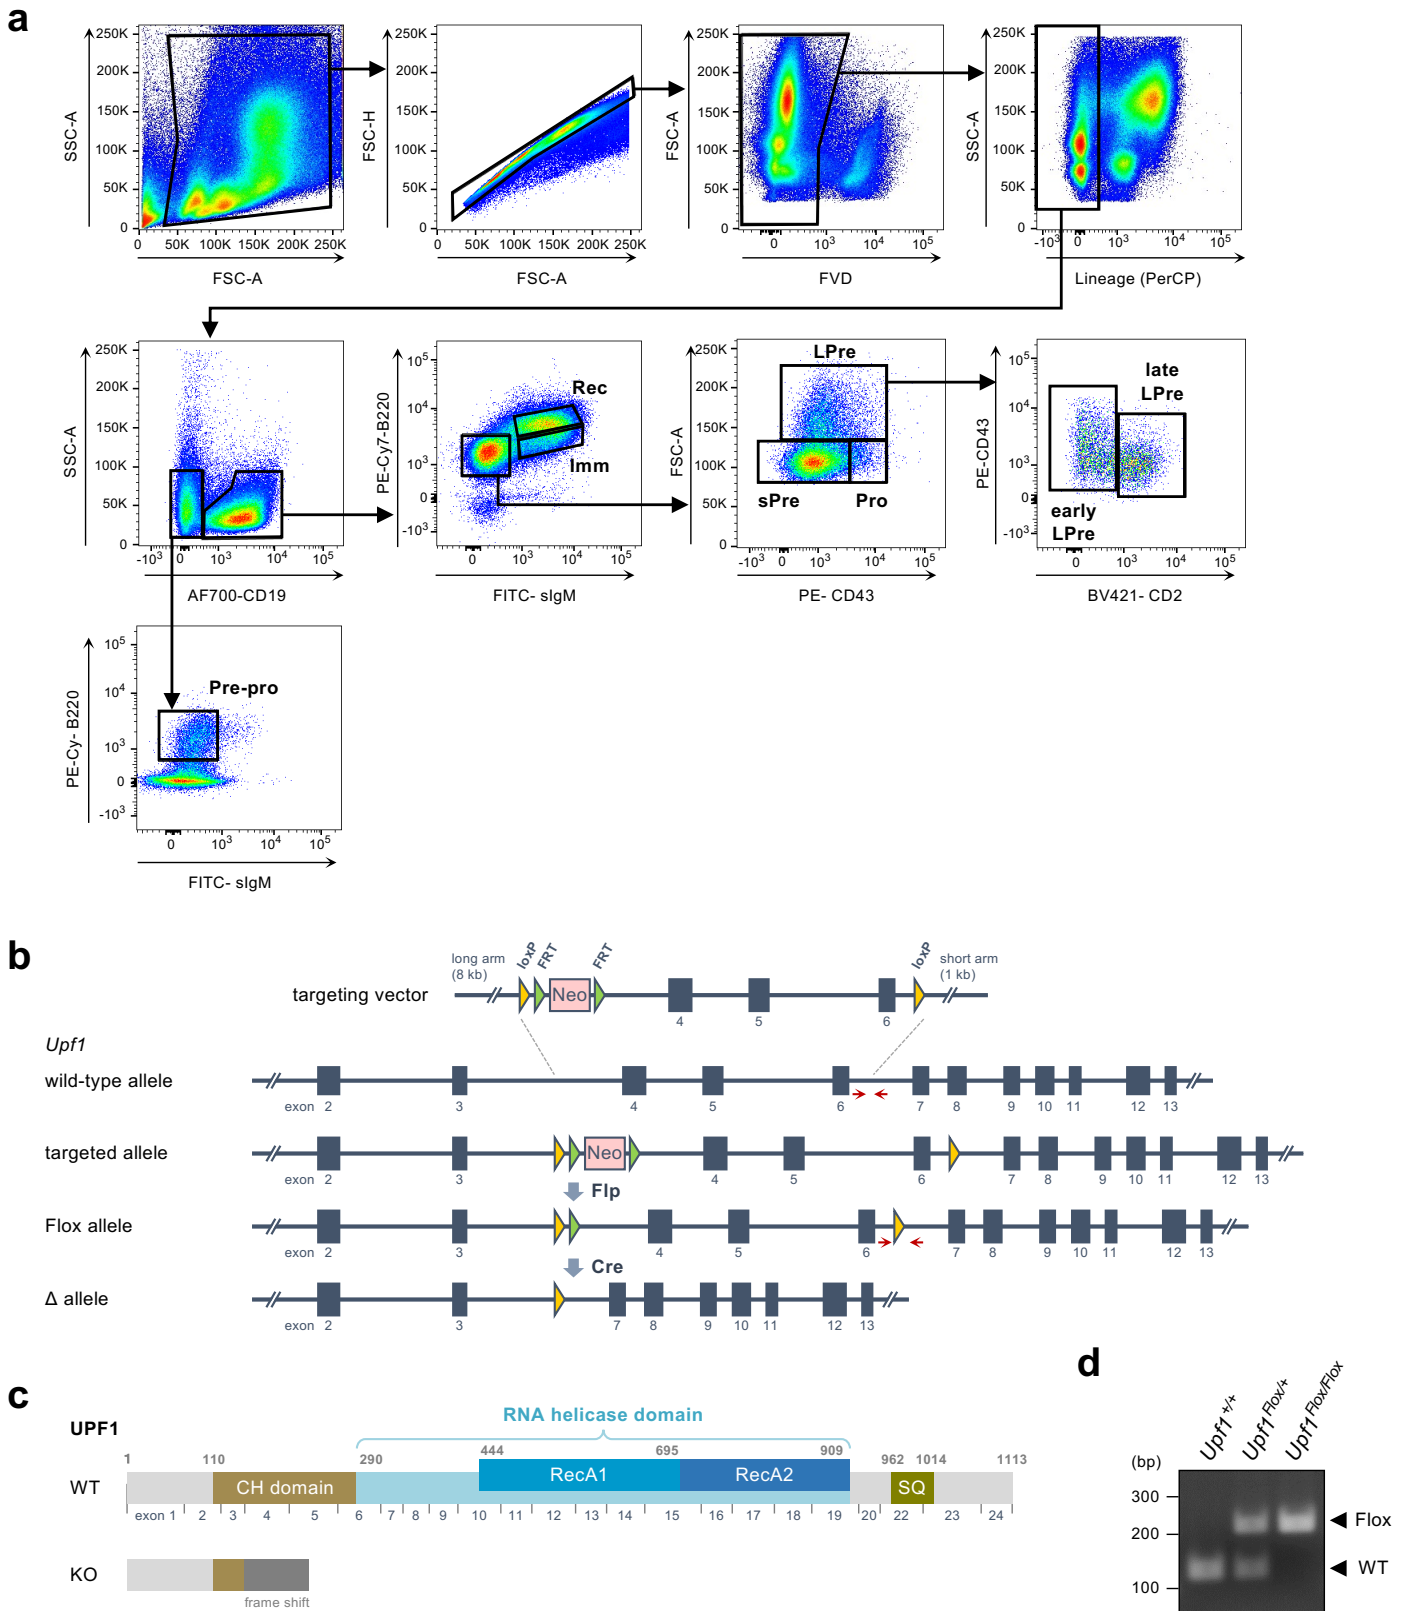

### Supplementary Figure 1 Analysis and generation of B cell specific *Upf1* deficient mice

- (a) Gating strategy of BM B cells. Harvested cells were stained and separated with the indicated markers.
- (b) Structure of the target *Upf1* allele. Red arrows indicate the primers used for genotyping.
- (c) The schematic illustration of mouse UPF1 and predicted translation product from *Upf1*<sup>Flox</sup> allele in *Upf1*-cKO.
- (d) PCR genotyping of genomic DNAs from *Upf1*<sup>+/+</sup>, *Upf1*<sup>Flox/+</sup>, or *Upf1*<sup>Flox/Flox</sup> mice. Results are representative of at least three independent experiments.

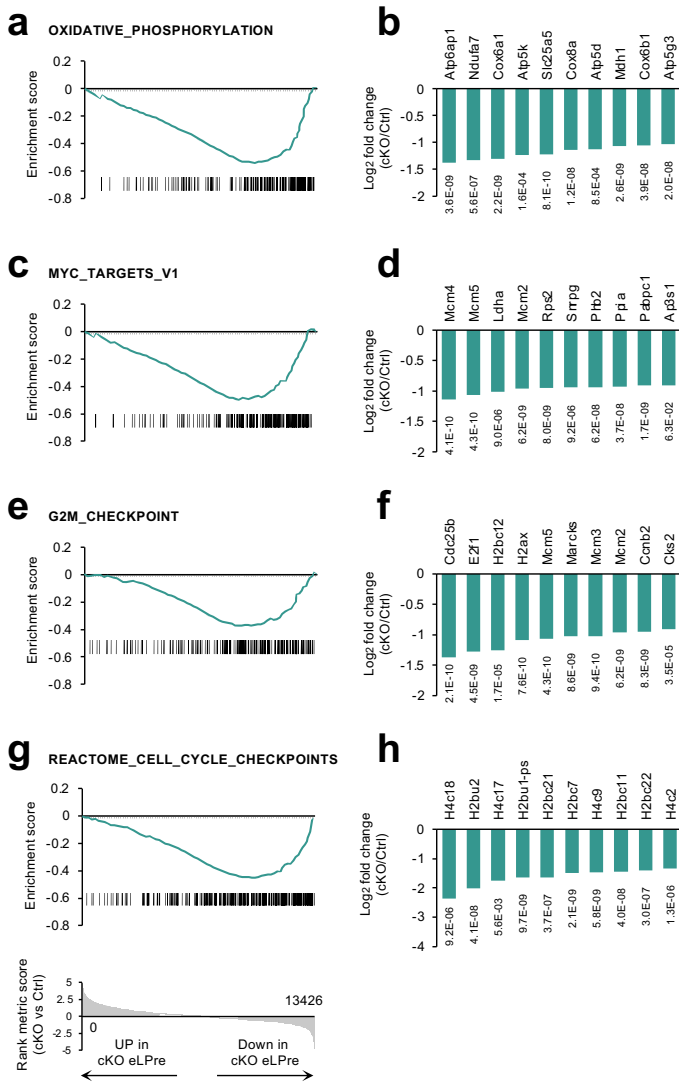

**Supplementary Figure 2 Enrichment score plot of down-regulated genes in *Upf1*-deficient early LPre-B cells** (a-h) Enrichment score plot (a, c, e, g) and comparison of each gene expression between *Upf1*-cKO- and Ctrl-early LPre-B cells (b, d, f, h) in indicated gene sets (a, b; OXIDATIVE PHOSPHORYLATION, c, d; MYC TARGETS V1, e, f; G2M CHECKPOINT, g, h; CELL CYCLE CHECKPOINTS). Bars indicate Log2FC (*Upf1*-cKO vs Ctrl), and the number adjacent to each bar indicates adj.*P*. The statistical analyses were performed using GSEA.

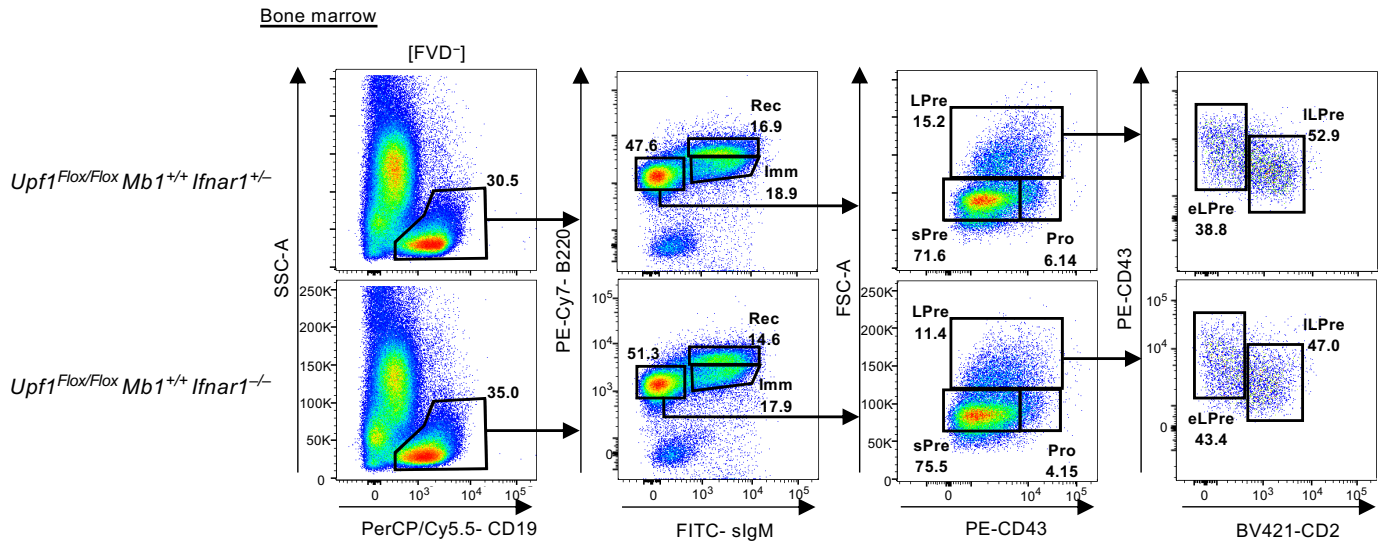

**Supplementary Figure 3 Loss of IFN $\alpha$ R1 signaling does not impact B cell development.**

Flow cytometry plots of indicated populations in the BM of indicated mice. Results are representative of two independent experiments.

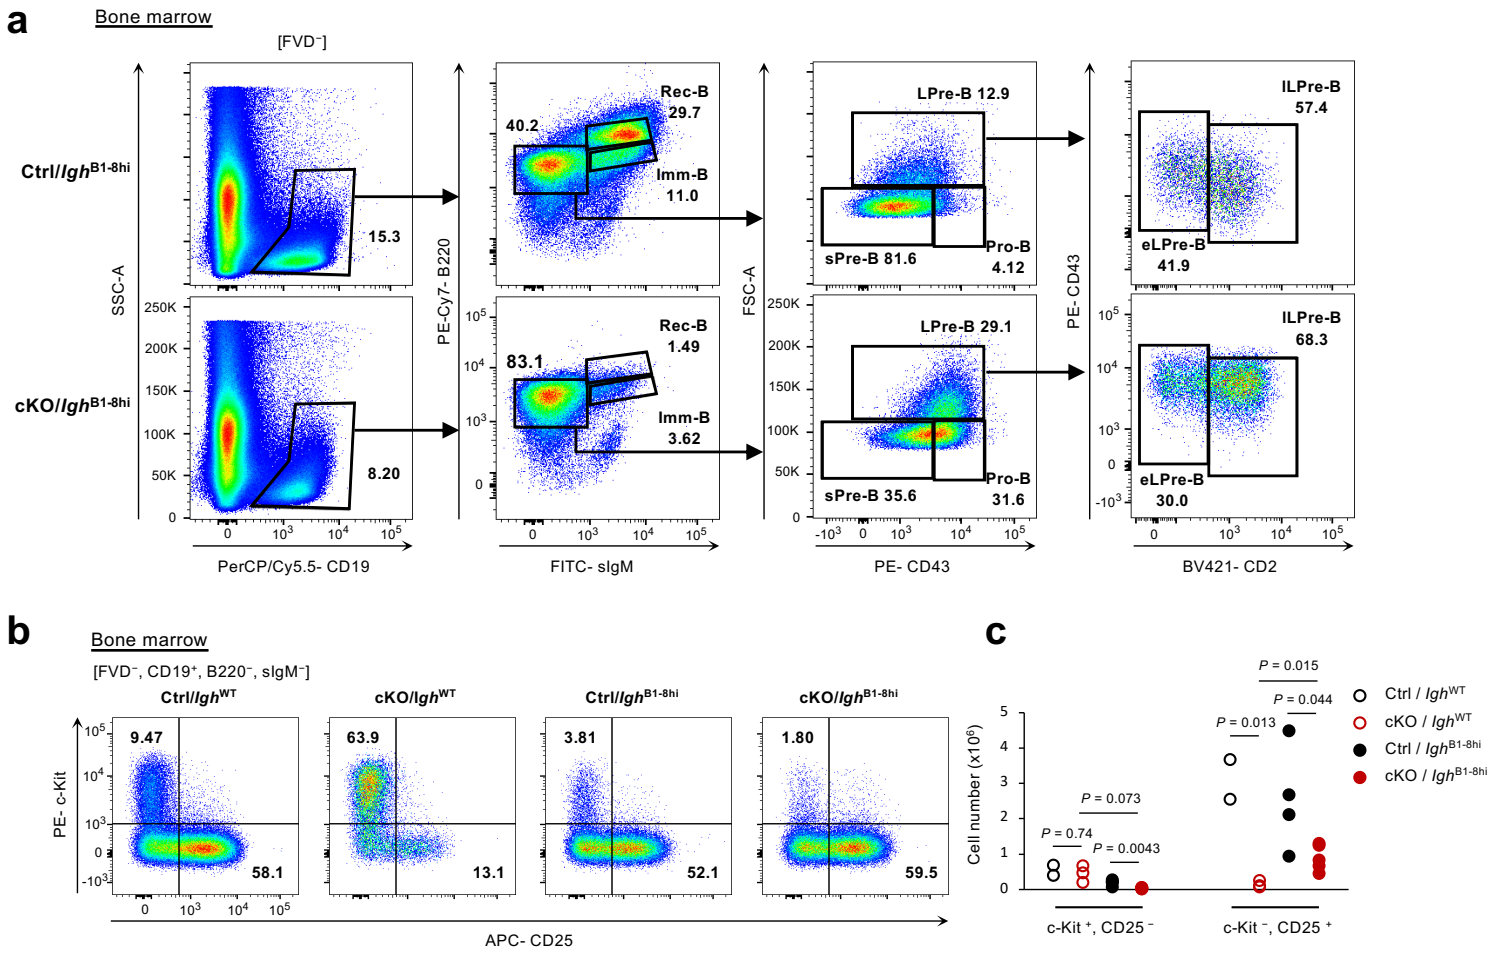

**Supplementary Figure 4 Genetic pre-arrangement of *Igh* locus rescued early to late LPre B cell differentiation in *Upf1*-cKO mice**

(a) Flow cytometry of indicated populations in the BM of indicated mice. (b, c) Flow cytometry plots (b) and cell number quantification (c) of FVD<sup>-</sup>, CD19<sup>+</sup>, B220<sup>+</sup>, sIgM<sup>-</sup> cells derived from BM of indicated mice. BMs were harvested from bones of both hind legs. The *p*-values were calculated using two-sided Student's *t*-test. Results are representative of at least three independent experiments (*N* = 3 (Ctrl/*Igh*<sup>WT</sup>, cKO/*Igh*<sup>WT</sup>), *N* = 4 (Ctrl/*Igh*<sup>B1-8hi</sup>), *N* = 5 (cKO/*Igh*<sup>B1-8hi</sup>).

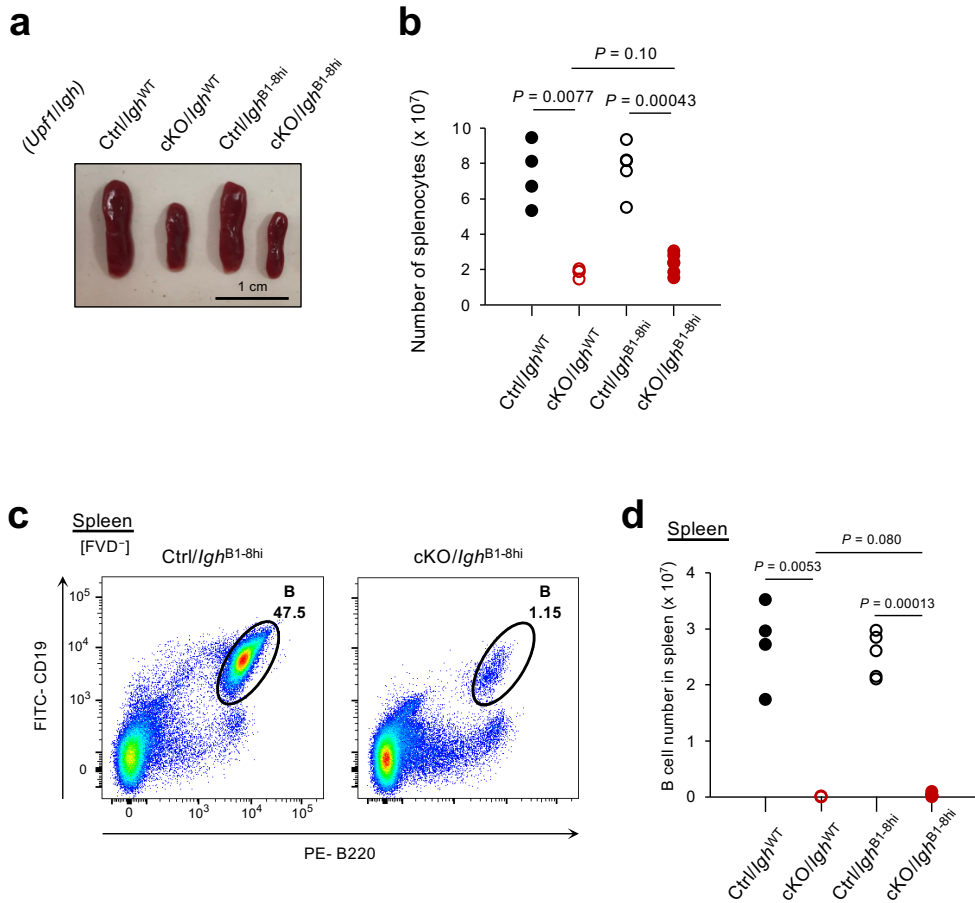

**Supplementary Figure 5 Genetic pre-arrangement of *Igh* locus did not rescue the splenic B cell population in *Upf1*-cKO mice**

(a) Appearance of spleens derived from indicated mice. Results are representative of at least three independent experiments. (b) Numbers of splenocytes derived from indicated mice.  $N = 4$  (Ctrl/Igh<sup>WT</sup>, cKO/Igh<sup>WT</sup>),  $N = 5$  (Ctrl/Igh<sup>B1-8hi</sup>),  $N = 6$  (cKO/Igh<sup>B1-8hi</sup>). (c and d) Flow cytometry plots (c) and quantifications (d) of splenic B cells (B220<sup>+</sup>, CD19<sup>+</sup>) of indicated mice.  $N = 4$  (Ctrl/Igh<sup>WT</sup> cKO/Igh<sup>WT</sup>),  $N = 5$  (Ctrl/Igh<sup>B1-8hi</sup>),  $N = 6$  (cKO/Igh<sup>B1-8hi</sup>). The  $p$ -values were calculated using two-sided Student's  $t$ -test.

**a**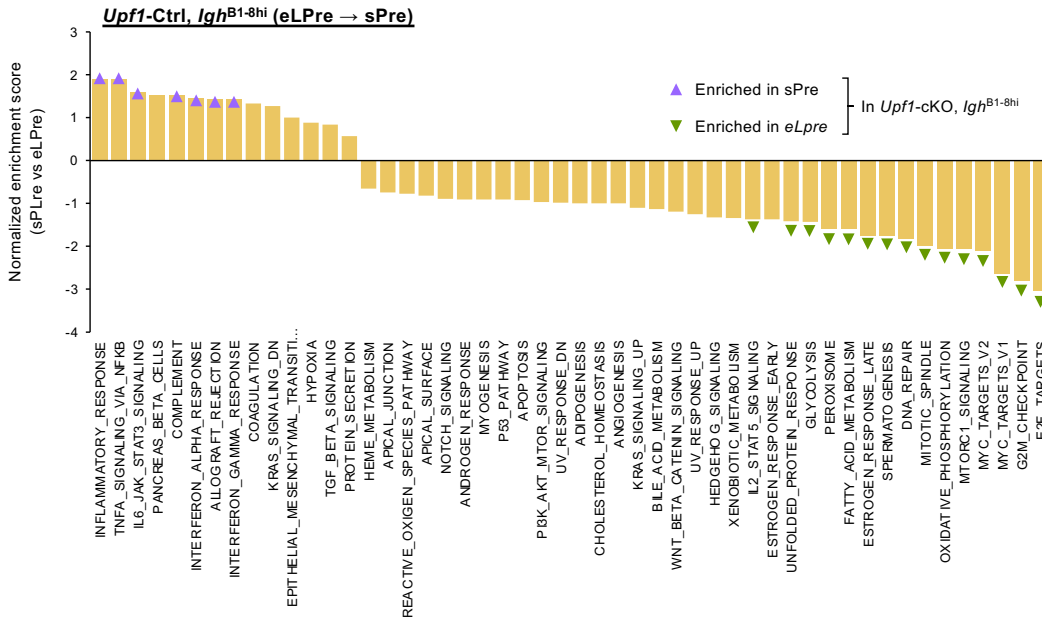**b**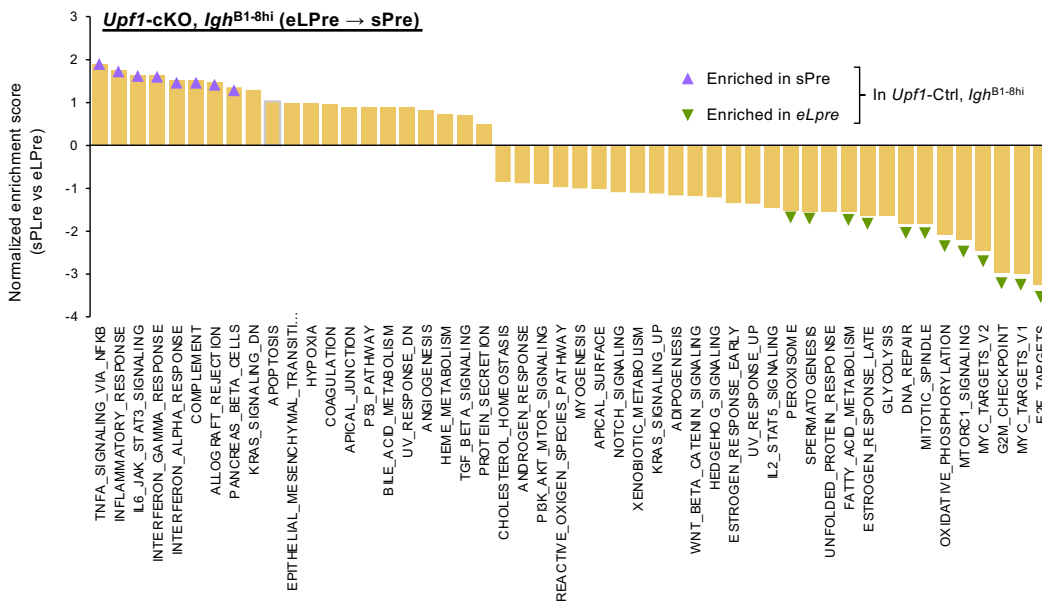**c**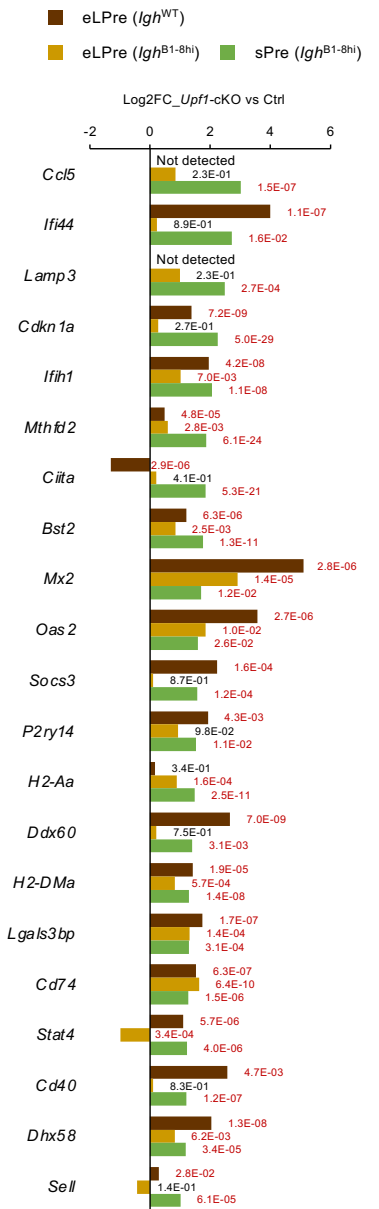

### Supplementary Figure 6 Transcriptome analysis of *Upfl-cKO/Igh*<sup>B1-8hi</sup> early LPre- and sPre-B cells

(a, b) Normalized enrichment score of GSEA (sPre- vs early LPre (eLPre)-B cells) in *Upfl-Ctrl/Igh*<sup>B1-8hi</sup> (a) and *Upfl-cKO/Igh*<sup>B1-8hi</sup> (b). Green and purple arrows indicate the gene sets enriched in early LPre- and sPre-B cells in antagonistic genotype (*Upfl-Ctrl/Igh*<sup>B1-8hi</sup> for *Upfl-cKO/Igh*<sup>B1-8hi</sup> and vice versa), respectively. (c) Comparison of IFNA/IFNG RESPONSE gene expression between *Upfl-cKO* vs Ctrl in indicated genotypes and cell types. The number adjacent to each bar indicates adj.P (red; adj.P < 0.05). Only the genes with significantly high expression in *Upfl-cKO/Igh*<sup>B1-8hi</sup> sPre B cells (Log2FC >= 1, adj.P < 0.05) are shown. The statistical analyses were performed using limma (*Igh*<sup>WT</sup>), and edgeR (*Igh*<sup>B1-8hi</sup>).

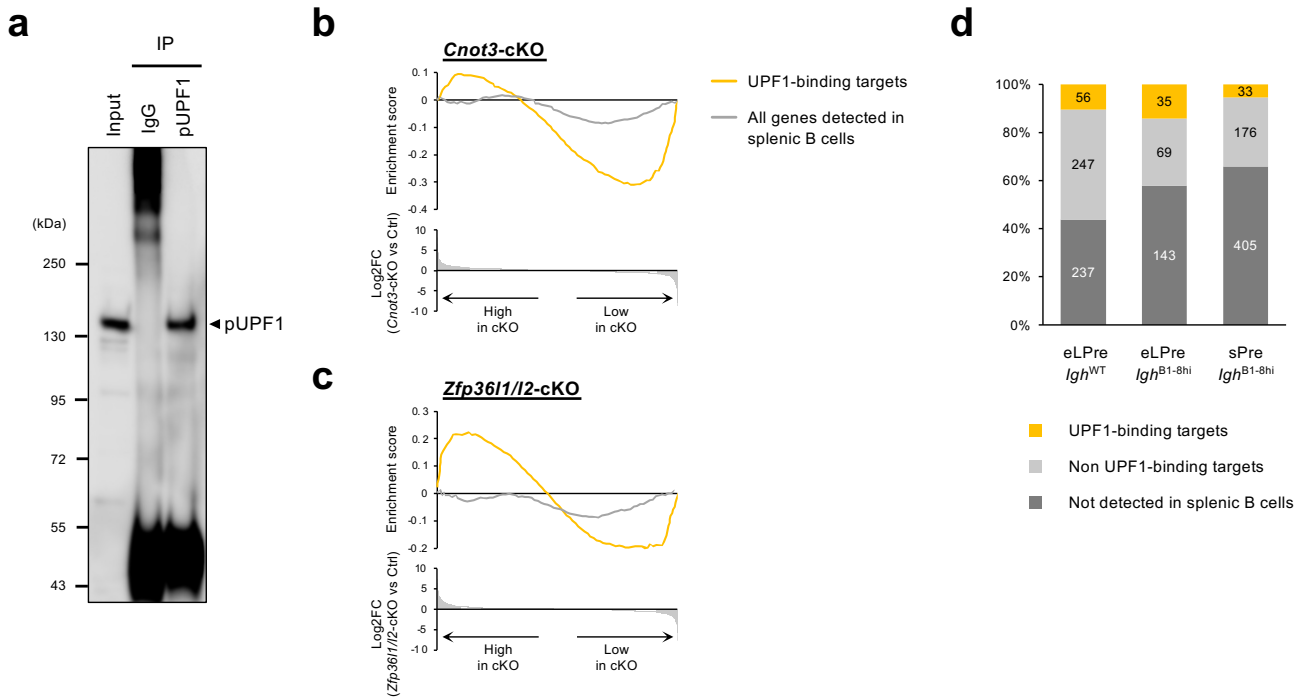

### Supplementary Figure 7 Identifying UPF1-target RNAs

(a) Immunoblot analysis of p-UPF1 precipitated with anti-p-UPF1 antibody or normal rIgG1 (negative control). Arrow indicates p-UPF1. Results are representative of two independent experiments. (b, c) Enrichment score plot of UPF1-binding targets (yellow) and all genes detected in splenic B cells (gray) in *Cnot3-cKO* vs Ctrl (b) and *Zfp3611/12-cKO* vs Ctrl (c). (d) Percentage of detected (yellow; target of UPF1, gray; non-target of UPF1) and undetected (dark gray) RNAs in RIP-seq using splenic B cells among the genes with significantly high expression in *Upf1-cKO* in indicated genotypes and cell types. The absolute number of the genes is shown in each bar.



### Supplementary Table 1 List of primers used for PCR

|                                          |                                     |
|------------------------------------------|-------------------------------------|
| Genotyping for <i>Upf1</i> -Flox forward | GAATTGGTGGCATGGGTCCCATATCCCAG       |
| Genotyping for <i>Upf1</i> -Flox reverse | GACTCTTCCTGGCCTTGAGCCTGGATG         |
| V <sub>H</sub> J558 forward              | CGAGCTCTCCARCACAGCCTWCATGCARCTCARC  |
| V <sub>H</sub> 7183 forward              | CGGTACCAAGAASAMCCTGTWCCTGCAAATGASC  |
| D <sub>H</sub> forward                   | TTCAAAGCACAATGCCTGGCT               |
| J <sub>H</sub> 3 reverse                 | GTCTAGATTCTCACAAAGAGTCCGATAGACCCTGG |
| C <sub>μ</sub> forward                   | TGGCCATGGGCTGCCTAGCCCCGGGACTT       |
| C <sub>μ</sub> reverse                   | GCCTGACTGAGCTCACACAAGGAGGA          |
| V <sub>k</sub> forward                   | GGCTGCAGSTTCAGTGGCAGTGGRTCWGGGRAC   |
| J <sub>k</sub> reverse                   | CTCATTCTGTTGAAGCTCTTGACAATGGG       |

### Supplementary Table 2 List of antibodies

| Antibody                           | Cat#       | Company           | Clone      | Application    | Dilution |
|------------------------------------|------------|-------------------|------------|----------------|----------|
| anti-Upf1                          | NBP1-05967 | Novus biologicals | Polyclonal | Immunoblot     | 1:1000   |
| anti-phospho-Upf1                  | 07-1016    | Merck             | Polyclonal | Immunoblot     | 1:1000   |
| anti-β-actin                       | sc-1615    | Santa Cruz        | Polyclonal | Immunoblot     | 1:2000   |
| anti-Mouse IgG                     | NA9310     | Cytiva            | Polyclonal | Immunoblot     | 1:2000   |
| anti-Rabbit IgG                    | NA9340     | Cytiva            | Polyclonal | Immunoblot     | 1:2000   |
| Biotin anti-mouse CD2              | 100103     | Biolegend         | RM2-5      | Flow cytometry | 1:300    |
| PerCP/Cy5.5 anti-mouse CD19        | 152405     | Biolegend         | 1D3        | Flow cytometry | 1:200    |
| FITC anti-mouse CD19               | 115506     | Biolegend         | 6D5        | Flow cytometry | 1:200    |
| Alexa Fluor 700 anti-mouse CD19    | 115527     | Biolegend         | 6D5        | Flow cytometry | 1:200    |
| APC Rat Anti-Mouse CD19            | 550992     | BD Pharmingen     | 1D3        | Flow cytometry | 1:200    |
| APC anti-mouse CD25                | 102011     | Biolegend         | PC61       | Flow cytometry | 1:200    |
| PE Rat Anti-Mouse CD43             | 561857     | BD Pharmingen     | S7         | Flow cytometry | 1:200    |
| FITC anti-mouse IgM                | 406505     | Biolegend         | RMM-1      | Flow cytometry | 1:200    |
| APC anti-mouse IgM                 | 406509     | Biolegend         | RMM-1      | Flow cytometry | 1:200    |
| PE-Cy7 Rat Anti-Mouse CD45R/B220   | 552772     | BD Pharmingen     | RA3-6B2    | Flow cytometry | 1:200    |
| FITC anti-mouse/human CD45R/B220   | 103206     | Biolegend         | RA3-6B2    | Flow cytometry | 1:200    |
| PE anti-mouse/human CD45R/B220     | 103208     | Biolegend         | RA3-6B2    | Flow cytometry | 1:200    |
| PE anti-mouse CD117 (c-Kit)        | 105807     | Biolegend         | 2B8        | Flow cytometry | 1:200    |
| PerCP Hamster Anti-Mouse CD3e      | 553067     | BD Pharmingen     | 145-2C11   | Flow cytometry | 1:100    |
| PerCP/Cy5.5 anti-mouse/human CD11b | 101228     | Biolegend         | M1/70      | Flow cytometry | 1:100    |
| PerCP anti-mouse CD11c             | 117326     | Biolegend         | N418       | Flow cytometry | 1:100    |
| PerCP anti-mouse F4/80             | 123125     | Biolegend         | BM8        | Flow cytometry | 1:100    |
| PerCP/Cy5.5 anti-mouse TER-119     | 116227     | Biolegend         | TER-119    | Flow cytometry | 1:100    |
| Brilliant Violet 421 Streptavidin  | 405225     | Biolegend         | —          | Flow cytometry | 1:400    |

### Supplementary Table 3 List of primers used for RT-qPCR

|                   | Forward                 | Reverse               |
|-------------------|-------------------------|-----------------------|
| 18S rRNA          | CGGACAGGATTGACAGATTG    | CAAATCGCTCCACCAAGTAA  |
| mouse <i>Upf1</i> | GCTGAACTTCGAGGAAGATG    | CTTCTTGCATTTTGCCCTC   |
| mouse <i>Gas5</i> | CAGGTATTAATGGGTCACCTC   | CTTCTATTTGAGCCTCCATCC |
| mouse <i>Mx1</i>  | GATCCGACTTCACTTCCAGATGG | CATCTCAGTGGTAGTCAACCC |
| mouse <i>Mx2</i>  | TTCACCAGGCTCCGAAAAGAG   | ACAAACCCTGGCAATTCTCG  |
