# Supplementary material for: UPF1 plays critical roles in early B cell development
Source: PubMed Central journal article supplement (PMC11233602; doi:10.1038/s41467-024-50032-6), 2024-07-09
Supplement: 41467_2024_50032_MOESM3_ESM.pdf [file 41467_2024_50032_MOESM3_ESM.pdf]

### **Description of Additional Supplementary Files**

File Name: Supplementary Data 1

Description: The Data of RNA-seq analysis of early LPre-B cells (Upf1-cKO vs Ctrl)

File Name: Supplementary Data 2

Description: The Data of RNA-seq analysis of early LPre-B (eLPre) and sPre-B cells from *Upf1*-cKO/*Igh*<sup>B1-8hi</sup> and Ctrl/*Igh*<sup>B1-8hi</sup> mice (eLPre\_cKO vs Ctrl, sPre\_cKO vs Ctrl, Ctrl\_sPre vs eLPre, cKO\_sPre vs eLPre)

File Name: Supplementary Data 3

Description: The Data of RIP-seq analysis using anti-p-UPF1 antibody in activated splenic B cells
